# Supplementary material for: Structure, equilibrium and ligand exchange dynamics in the binary and ternary dioxouranium(vi)–glyphosate–fluoride system. A multinuclear NMR study
Source: Royal Society of Chemistry journal article supplement (doi:10.1039/b206175a), 2002-01-01
Supplement: b206175a.pdf [file b206175a.pdf]

## Supplementary Information

### Structure, Equilibrium and Ligand Exchange Dynamics in the Binary and Ternary Dioxouranium(VI)-Glyphosate-Fluoride System. A Multinuclear NMR study.

Zoltán Szabó

Inorganic Chemistry, Department of Chemistry, Royal Institute of Technology (KTH),  
S-10044 Stockholm, Sweden

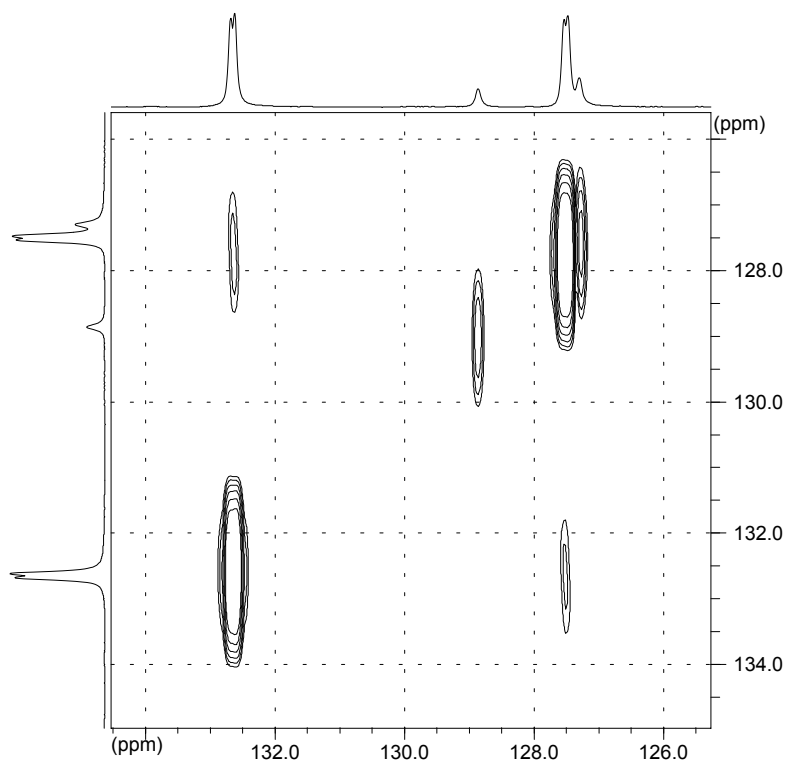

**Figure S1**  $^{19}\text{F}$ - $^{19}\text{F}$  homonuclear correlation (COSY) spectrum for complex **1** in the ternary uranium(VI)-glyphosate-fluoride system measured at  $-5\text{ }^\circ\text{C}$  using  $[\text{UO}_2^{2+}]_{\text{tot}} = 50\text{ mM}$ ,  $[\text{PMG}]_{\text{tot}} = 100\text{ mM}$  and  $[\text{F}^-]_{\text{tot}} = 500\text{ mM}$  at  $\text{pH}=9.5$ .

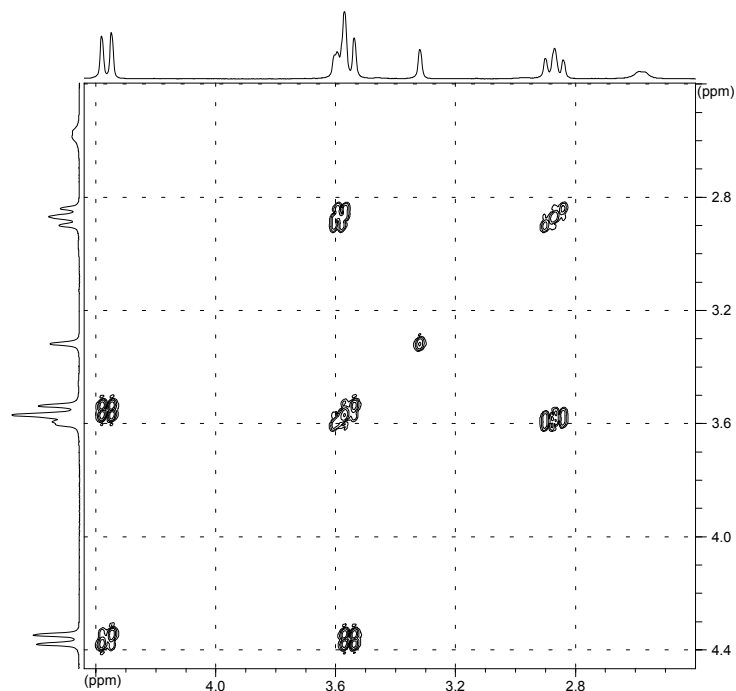

**Figure S2**  $^1\text{H}$ - $^1\text{H}$  homonuclear correlation (COSY-45) spectrum for complex **1** in the ternary uranium(VI)-glyphosate-fluoride system measured at  $-5\text{ }^\circ\text{C}$  using  $[\text{UO}_2^{2+}]_{\text{tot}} = 20\text{ mM}$ ,  $[\text{PMG}]_{\text{tot}} = 20\text{ mM}$  and  $[\text{F}^-]_{\text{tot}} = 800\text{ mM}$  at  $\text{pH}=8.8$ .

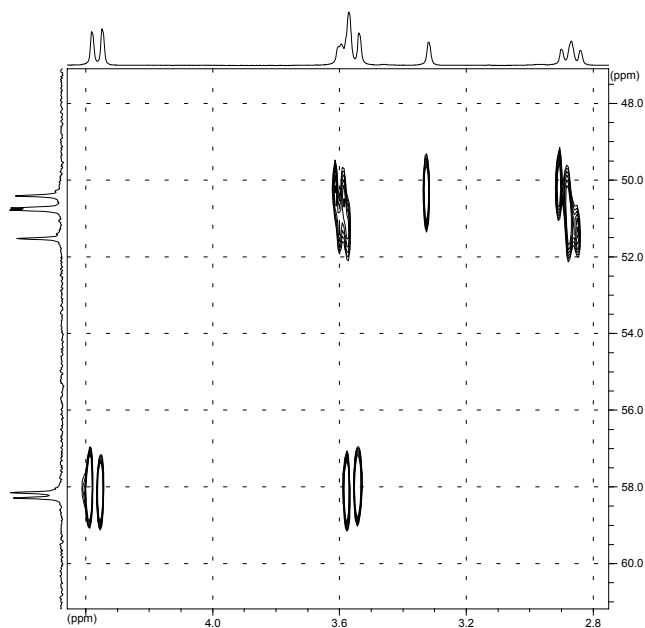

**Figure S3**  $^1\text{H}$ - $^{13}\text{C}$  heteronuclear correlation spectrum for complex **1** in the ternary uranium(VI)-glyphosate-fluoride system measured at  $-5\text{ }^\circ\text{C}$  using  $[\text{UO}_2^{2+}]_{\text{tot}} = 20\text{ mM}$ ,  $[\text{PMG}]_{\text{tot}} = 20\text{ mM}$  and  $[\text{F}^-]_{\text{tot}} = 800\text{ mM}$  at  $\text{pH}=8.8$ .

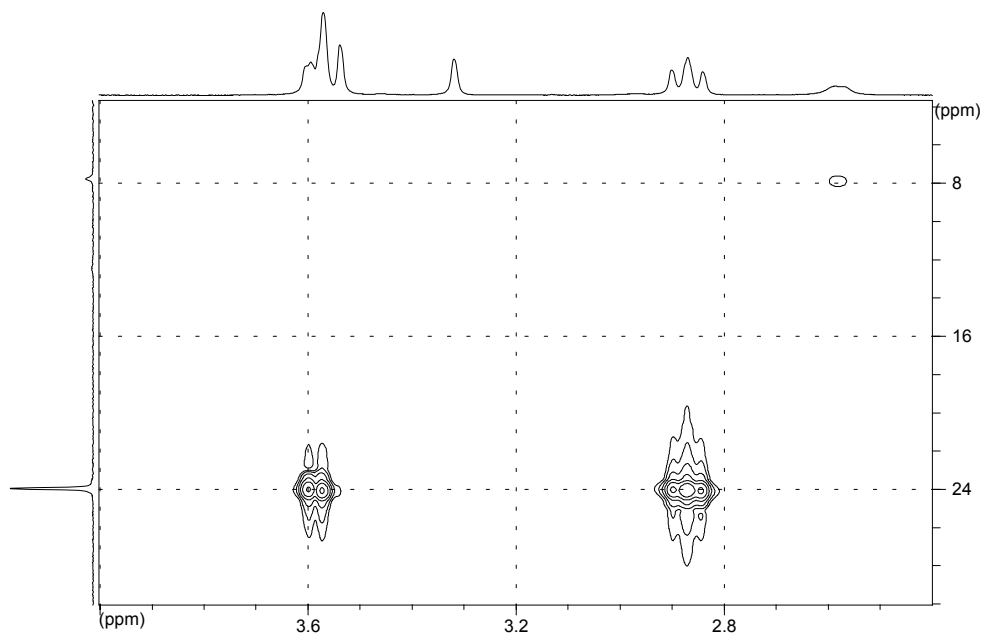

**Figure S4**  $^1\text{H}$ - $^{31}\text{P}$  heteronuclear correlation spectrum for complex **1** in the ternary uranium(VI)-glyphosate-fluoride system measured at  $-5\text{ }^\circ\text{C}$  using  $[\text{UO}_2^{2+}]_{\text{tot}} = 20\text{ mM}$ ,  $[\text{PMG}]_{\text{tot}} = 20\text{ mM}$  and  $[\text{F}^-]_{\text{tot}} = 800\text{ mM}$  at  $\text{pH}=8.8$ .

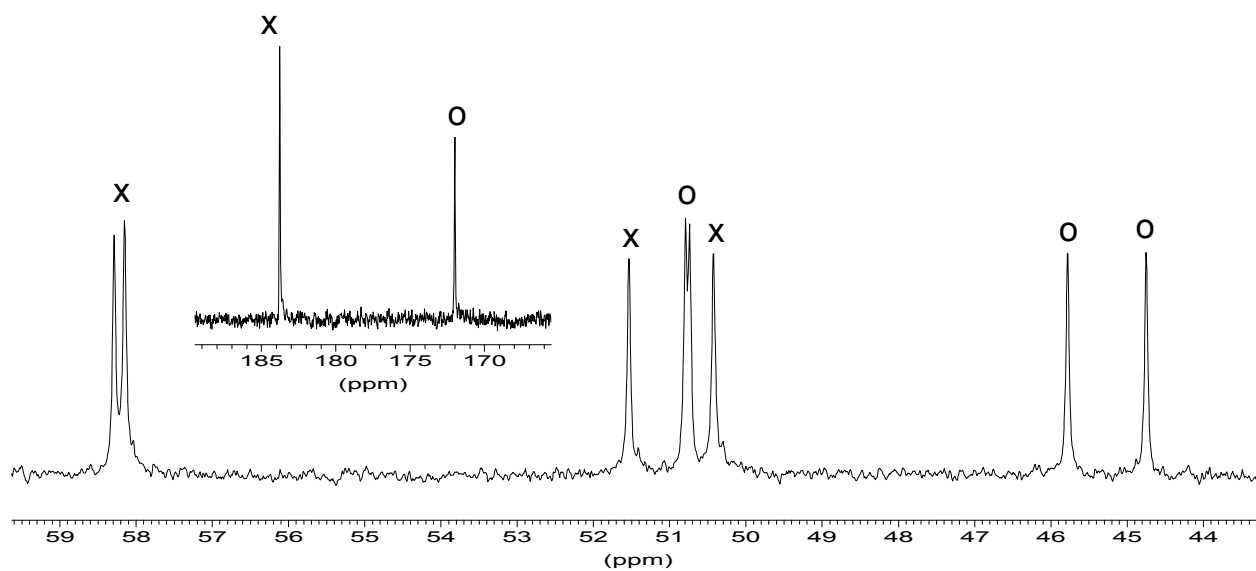

**Figure S5** Proton decoupled  $^{13}\text{C}$ -NMR spectrum in the ternary uranium(VI)-glyphosate-fluoride system measured at  $-5\text{ }^\circ\text{C}$  using  $[\text{UO}_2^{2+}]_{\text{tot}} = 20\text{ mM}$ ,  $[\text{PMG}]_{\text{tot}} = 35\text{ mM}$  and  $[\text{F}^-]_{\text{tot}} = 800\text{ mM}$  at  $\text{pH}=9.5$ . x: signals for the chelated glyphosate in complex **1**, o: signals for the free glyphosate. The inset shows the carbonyl carbons.

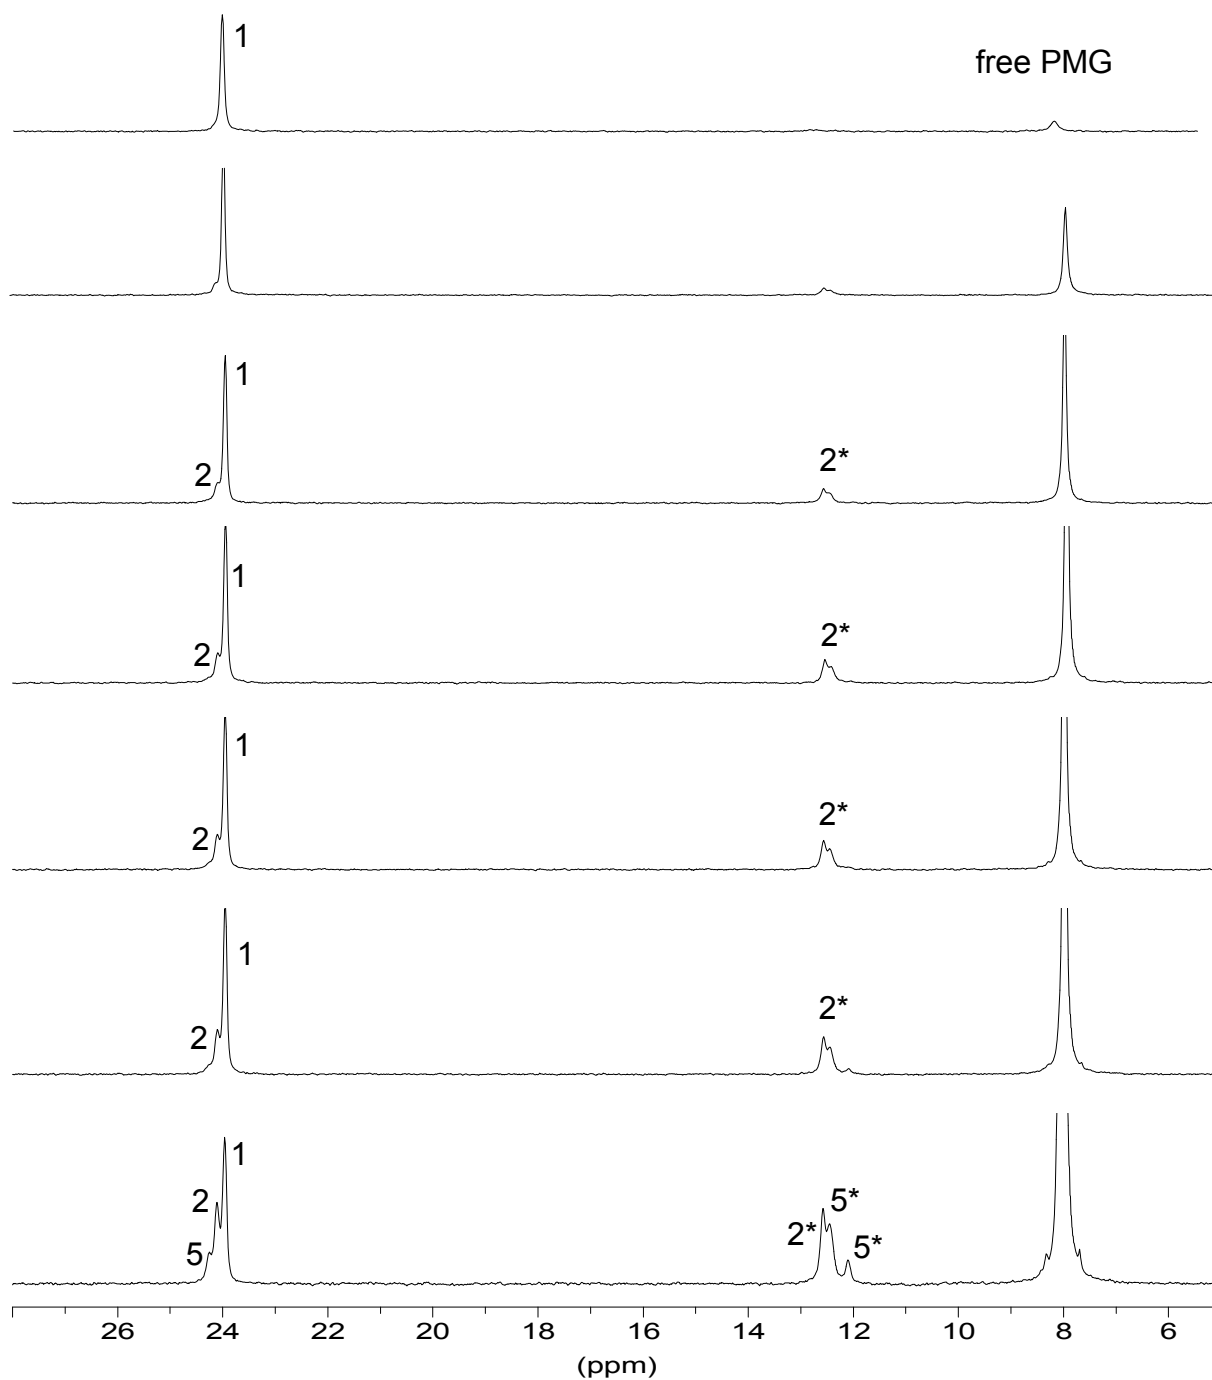

**Figure S6** Proton decoupled  $^{31}\text{P}$ -NMR spectra for the ternary uranium(VI)-glyphosate-fluoride system as a function of the total glyphosate concentration measured at  $-5\text{ }^{\circ}\text{C}$  using  $[\text{UO}_2^{2+}]_{\text{tot}}=20\text{ mM}$  and  $[\text{F}^-]_{\text{tot}}=800\text{ mM}$  at  $\text{pH}=8.8$ . The total glyphosate concentrations from top to bottom: 20.2, 38.4, 54.7, 69.5, 82.7, 94.6 and 202 mM. Star indicates the peaks from the non-chelated glyphosates in complexes **2** and **5**.

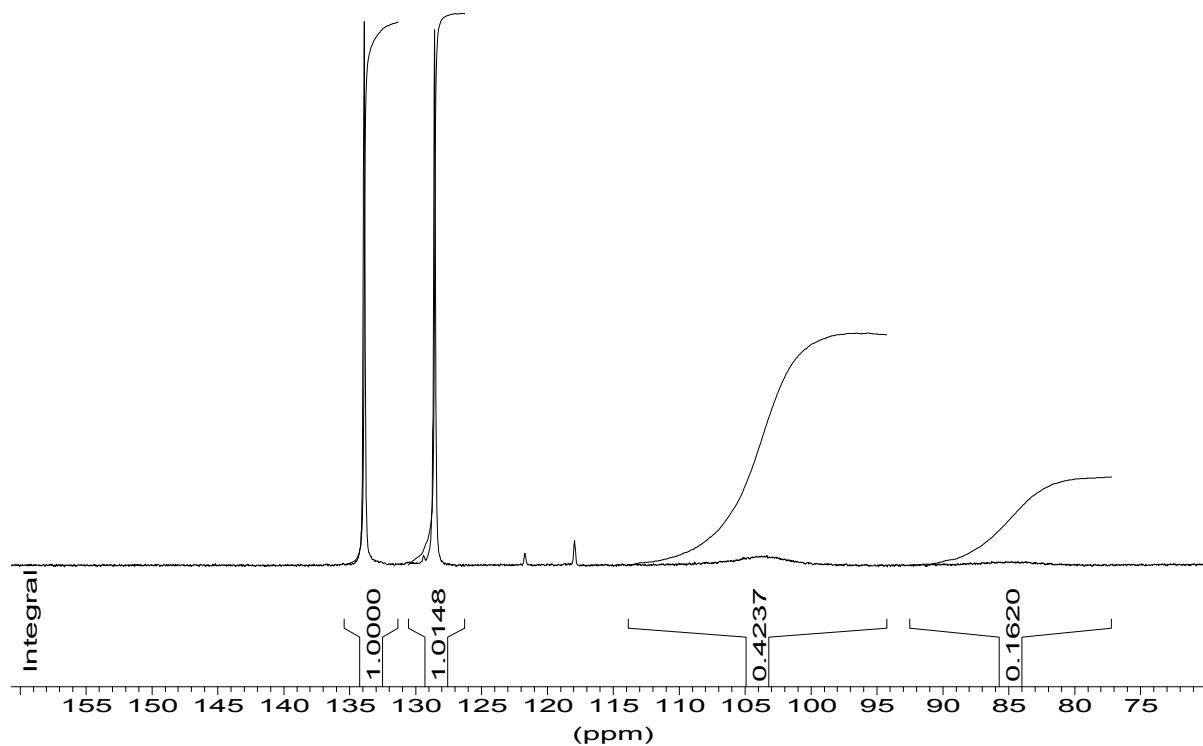

**Figure S7**  $^{19}\text{F}$ -NMR spectrum in the ternary uranium(VI)-glyphosate-fluoride system showing two coupled signals for complex **1** (134 and 128.5 ppm), and signals for the binary complexes  $\text{UO}_2\text{F}_4^{2-}$  ( $\sim 105$  ppm) and  $\text{UO}_2\text{F}_5^{3-}$  ( $\sim 85$  ppm). The spectrum was recorded at  $-5\text{ }^\circ\text{C}$  using  $[\text{UO}_2^{2+}]_{\text{tot}} = 20\text{ mM}$ ,  $[\text{PMG}]_{\text{tot}} = 20.2\text{ mM}$  and  $[\text{F}^-]_{\text{tot}} = 800\text{ mM}$  at  $\text{pH} = 8.8$

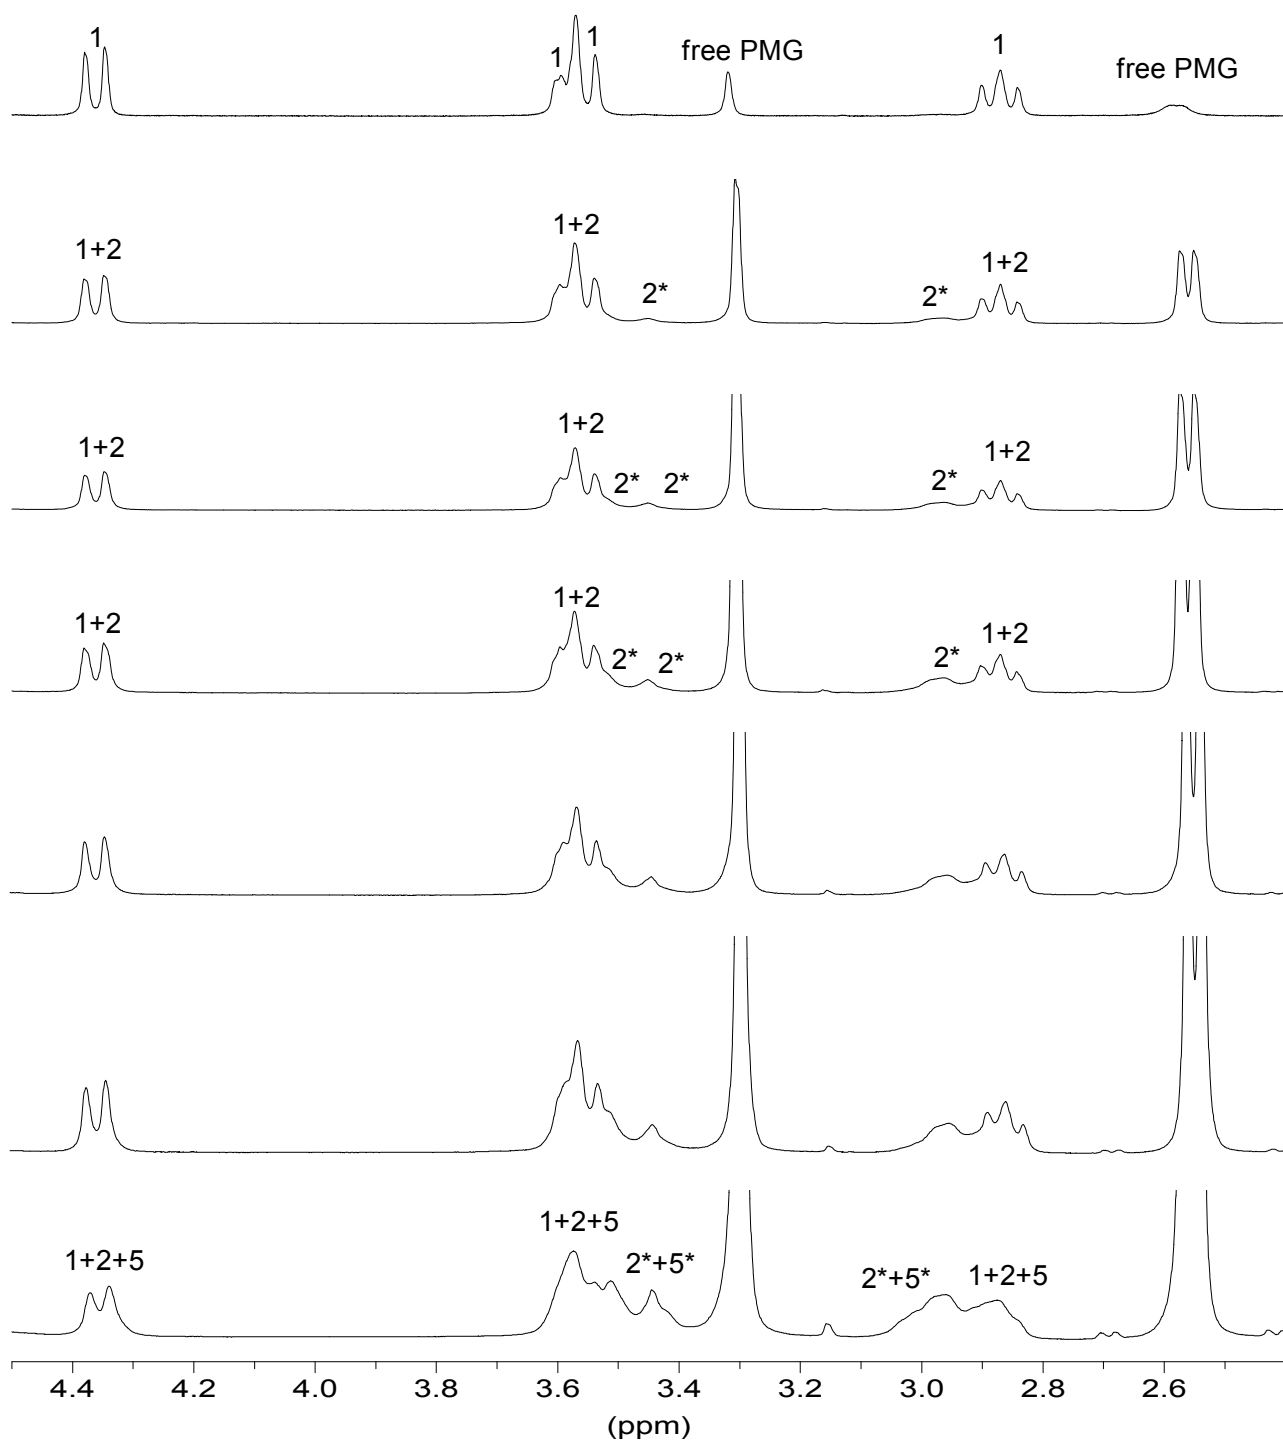

**Figure S8**  $^1\text{H}$ -NMR spectra for the ternary uranium(VI)-glyphosate-fluoride system as a function of the total glyphosate concentration measured at  $-5\text{ }^\circ\text{C}$  using  $[\text{UO}_2^{2+}]_{\text{tot}}=20\text{ mM}$  and  $[\text{F}^-]_{\text{tot}}=800\text{ mM}$  at  $\text{pH}=8.8$ . The total glyphosate concentrations are from top to bottom: 20.2, 38.4, 54.7, 69.5, 82.7, 94.6 and 202 mM. Star indicates the peaks for the non-chelated glyphosates in complexes **2** and **5**.

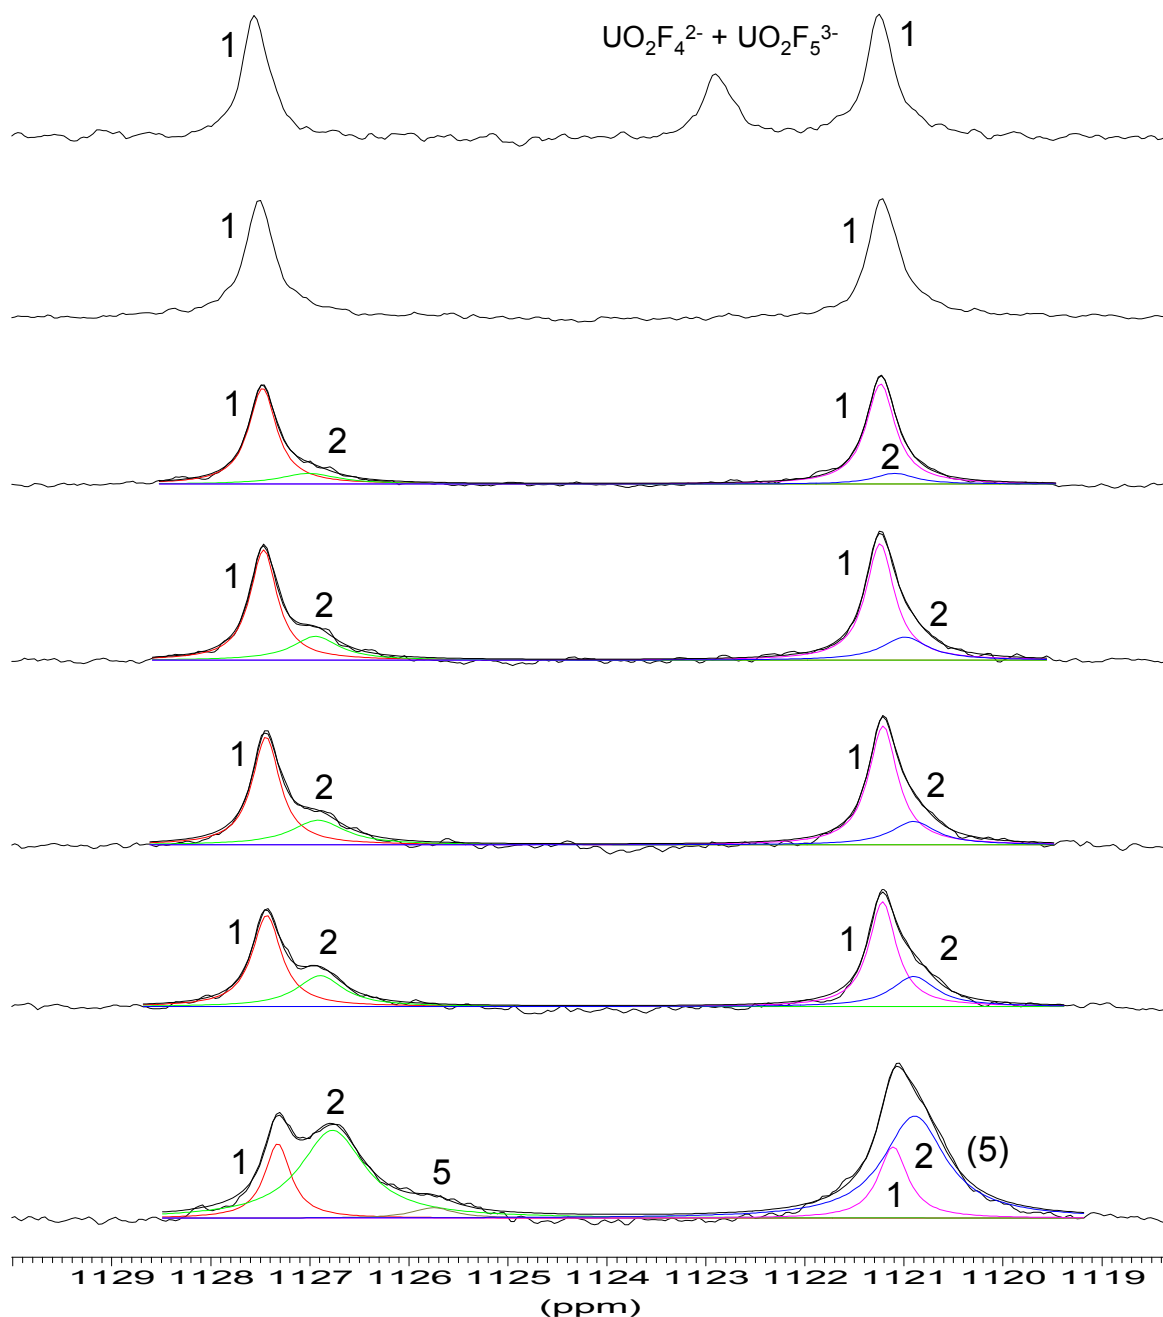

**Figure S9**  $^{17}\text{O}$ -NMR spectra for the ternary uranium(VI)-glyphosate-fluoride system as a function of the total glyphosate concentration measured at  $-5\text{ }^\circ\text{C}$  using  $[\text{UO}_2^{2+}]_{\text{tot}}=20\text{ mM}$  and  $[\text{F}^-]_{\text{tot}}=800\text{ mM}$  at  $\text{pH}=8.8$ . The total glyphosate concentrations are from top to bottom: 20.2, 38.4, 54.7, 69.5, 82.7, 94.6 and 202 mM. The peak at 1123 ppm is from the binary fluoride complexes,  $\text{UO}_2\text{F}_4^{2-}$  and  $\text{UO}_2\text{F}_5^{3-}$  present in the solution. The deconvoluted peaks are for complexes **1** (1121.3 and 1127.4 ppm) and **2** (1120.8 and 1126.8). Only one of the peaks can be resolved for complex **5** at 1125.7 ppm.

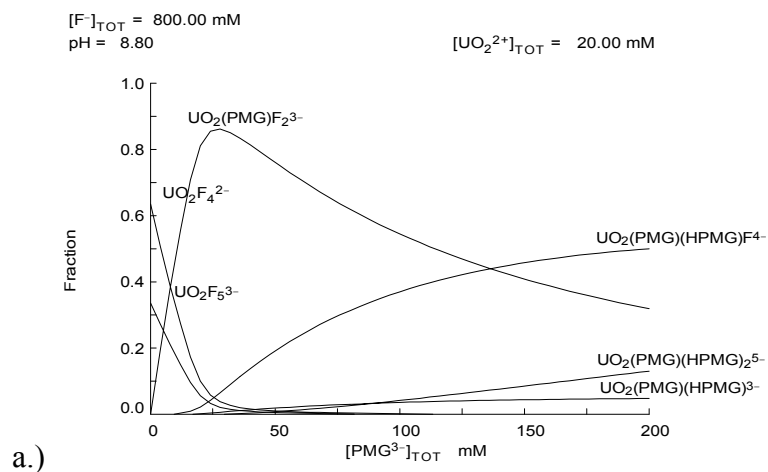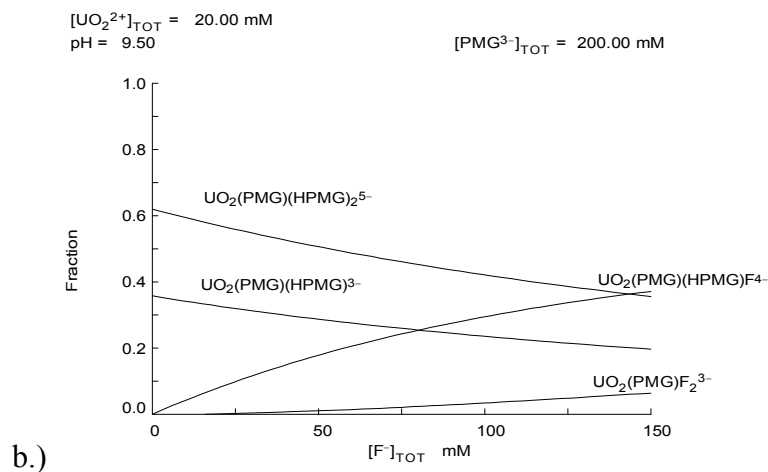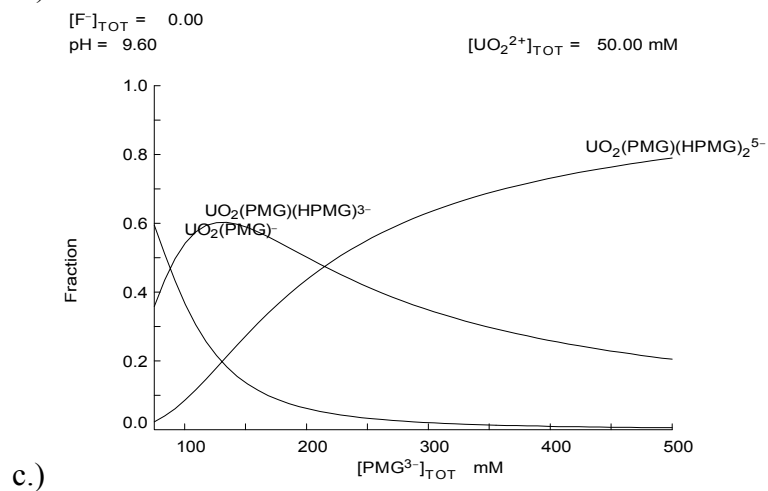

**Figure S10** Equilibrium distribution diagrams for the ternary uranium(VI)-glyphosate-fluoride system as a function of the total glyphosate concentration at  $\text{pH}=8.8$ ,  $[UO_2^{2+}]_{tot}=20 \text{ mM}$ ,  $[F^-]_{tot}=800 \text{ mM}$  (a), and as a function of the total fluoride concentration at  $\text{pH}=9.5$ ,  $[UO_2^{2+}]_{tot}=20 \text{ mM}$  and  $[PMG]_{tot}=200 \text{ mM}$  (b). Distribution diagram for the binary uranium(VI)-glyphosate system as a function of the total glyphosate concentration using  $[UO_2^{2+}]_{tot}=50 \text{ mM}$  at  $\text{pH}=9.6$  (c). PMG:  $OOC-CH_2-NH-CH_2-PO_3^{3-}$



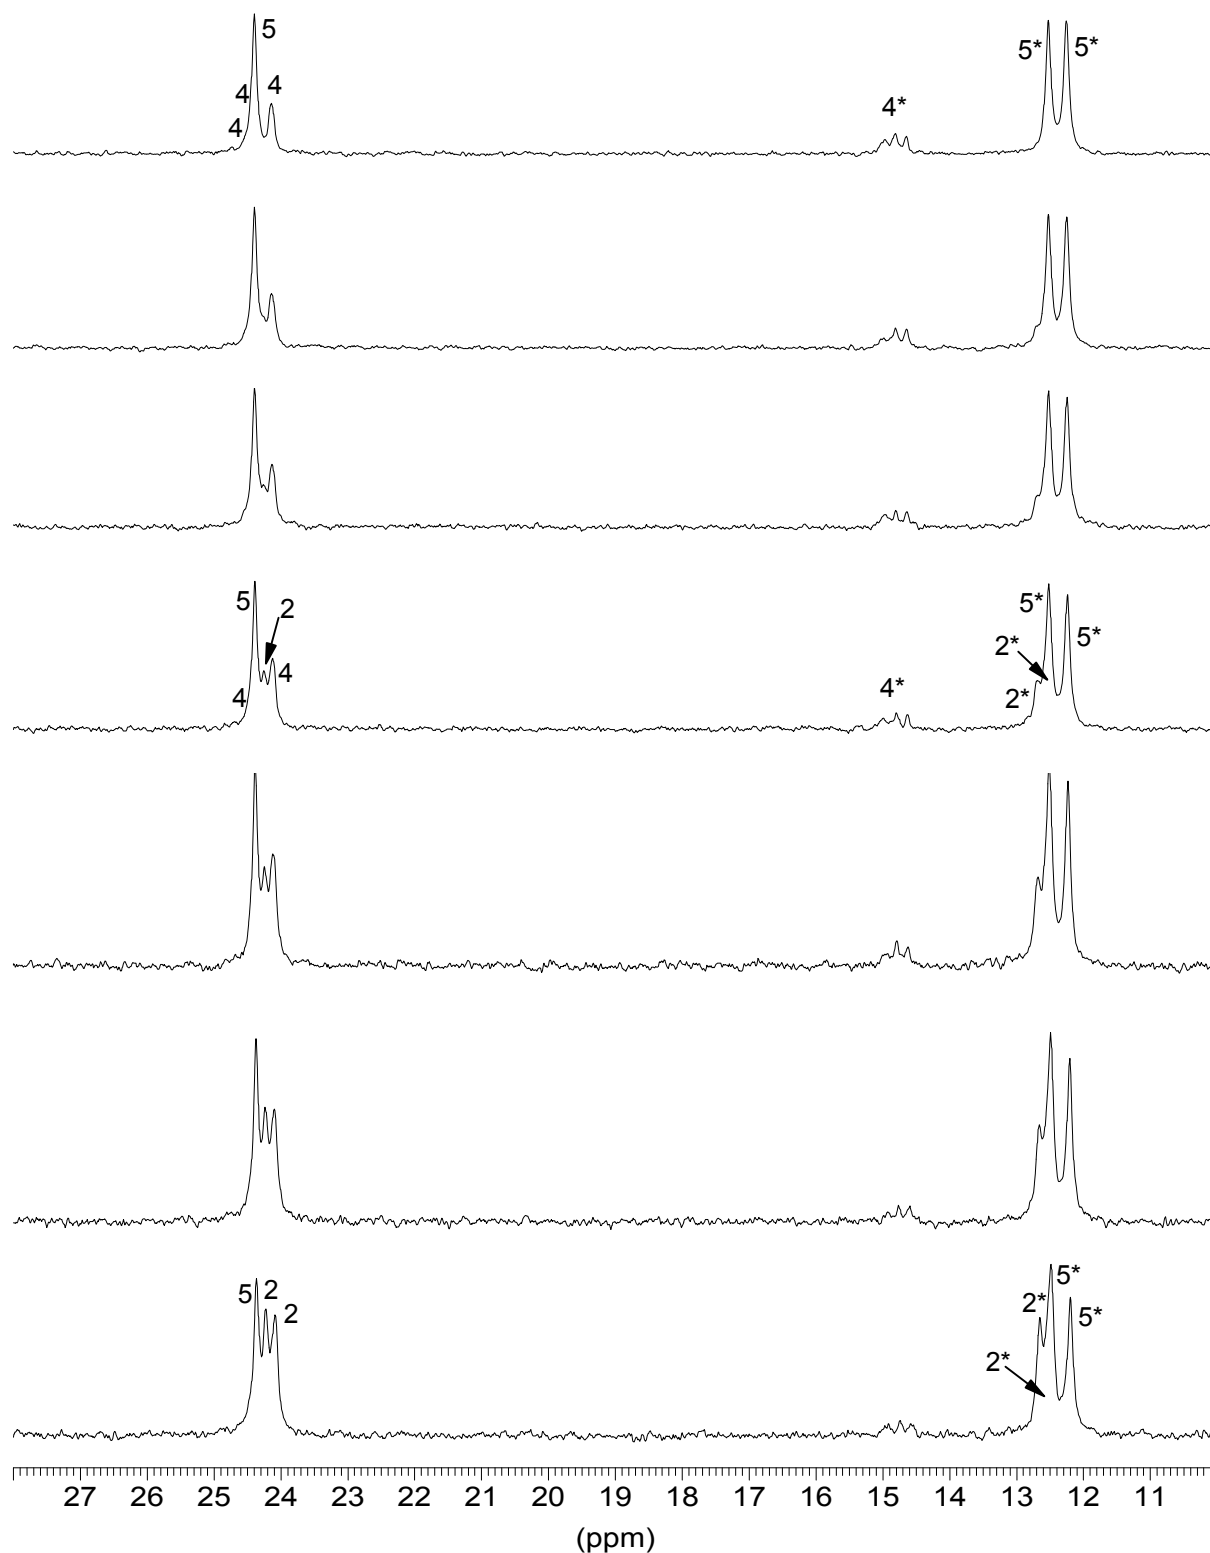

**Figure S11** Proton decoupled  $^{31}\text{P}$ -NMR spectra for the ternary uranium(VI)-glyphosate-fluoride system as a function of the total fluoride concentration measured at  $-5\text{ }^\circ\text{C}$  using  $[\text{UO}_2^{2+}]_{\text{tot}}=20\text{ mM}$  and  $[\text{PMG}]_{\text{tot}}=200\text{ mM}$  at  $\text{pH}=9.5$ . The total fluoride concentrations are from top to bottom: 0, 8.4, 17.0, 34.7, 52.6, 88.9, 123.9, 157.5. Star indicates the peaks for the non-chelated glyphosates in complexes **2**, **4** and **5**.

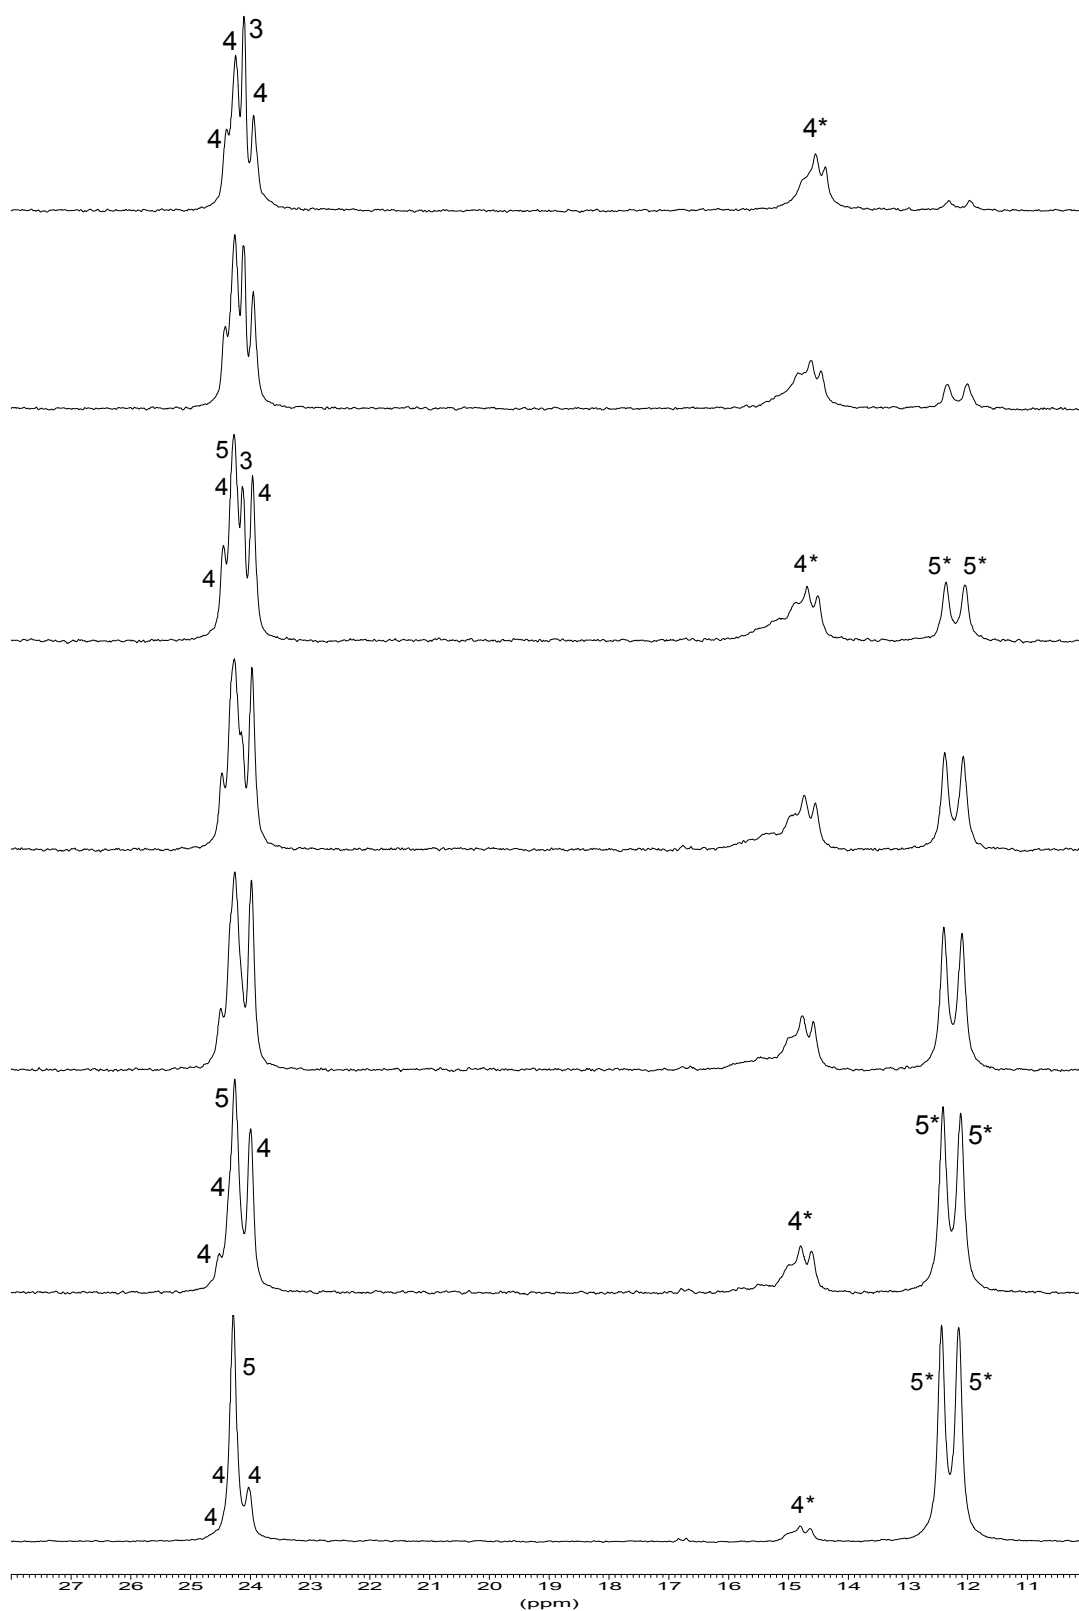

**Figure S12** Proton decoupled  $^{31}\text{P}$ -NMR spectra for the binary uranium(VI)-glyphosate system as a function of the total glyphosate concentration measured at  $-5\text{ }^\circ\text{C}$ , using  $[\text{UO}_2^{2+}]_{\text{tot}}=50\text{ mM}$  at  $\text{pH}=9.6$ . The total glyphosate concentrations are from top to bottom: 75.0, 97.3, 123.8, 157.6, 196, 257.5 and 500 mM. Star indicates the peaks for the non-chelated glyphosates in complexes **4** and **5**.

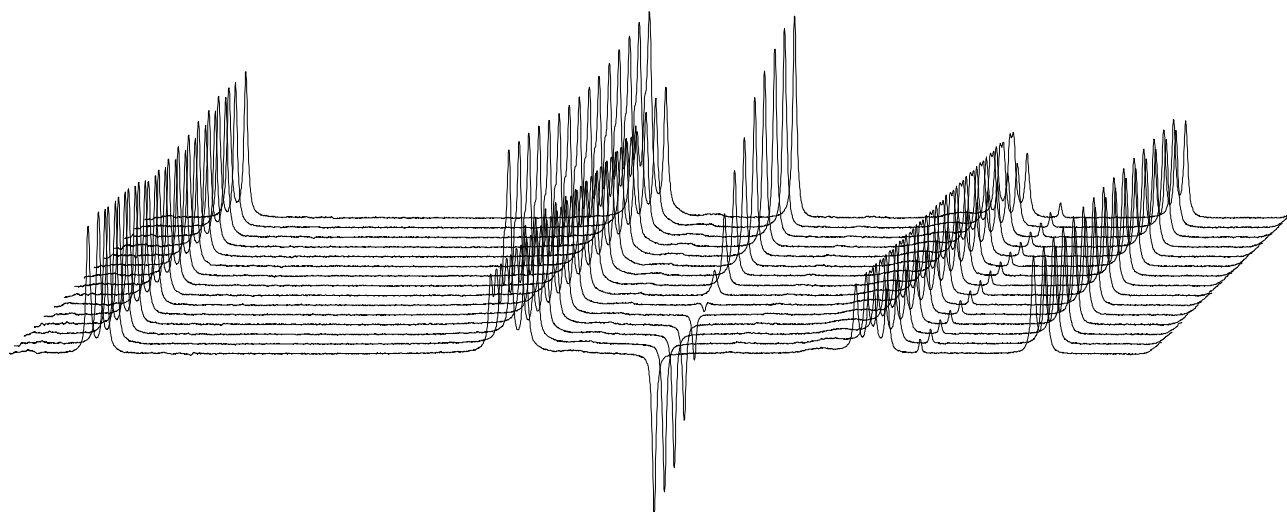

a.)

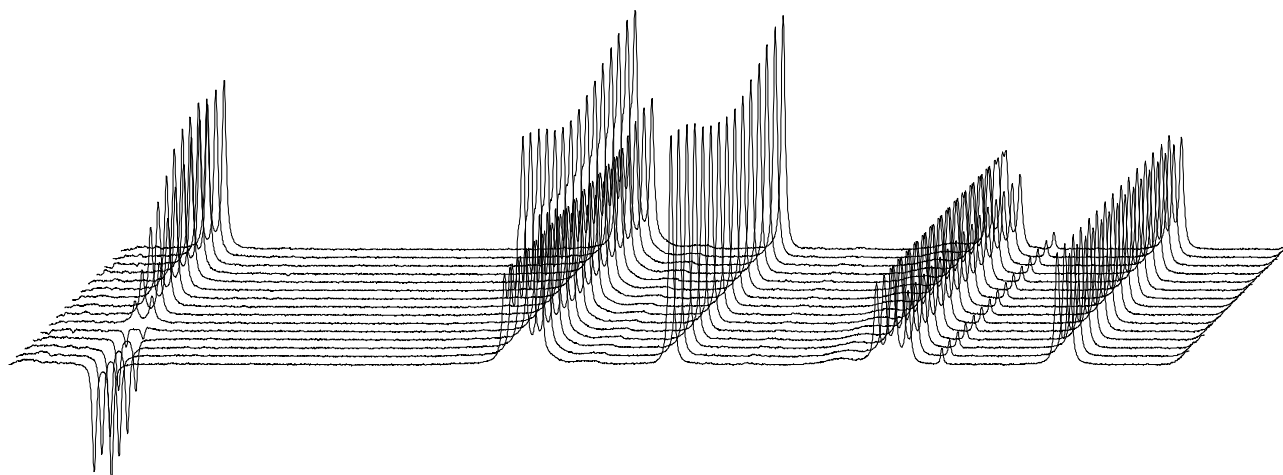

b.)

**Figure S13**  $^1\text{H}$ -NMR inversion transfer experiments to study the exchange between the free and coordinated glyphosate in complex **1**. The spectra were recorded at  $-5\text{ }^\circ\text{C}$  with increasing delays after selective inversion of the  $\text{CH}_2$  protons (at 3.3 ppm) in the free (a), and one of the  $\text{CH}_2$  protons (at 4.4 ppm) in the coordinated glyphosate.
